# Supplementary material
Source: HighWire-hosted journal article supplement (https://advances.sciencemag.org/content/suppl/2019/11/08/5.11.eaay6484)
Supplement: aay6484_SM.pdf [file aay6484_SM.pdf]

## Supplementary Materials for

### **In vivo changes of nanoapatite crystals during bone reconstruction and the differences with native bone apatite**

Xiyu Li, Qin Zou\*, Haifeng Chen, Wei Li\*

\*Corresponding author. Email: [leewei@scu.edu.cn](mailto:leewei@scu.edu.cn) (W.L.); [zouqin80913@126.com](mailto:zouqin80913@126.com) (Q.Z.)

Published 13 November 2019, *Sci. Adv.* **5**, eaay6484 (2019)

DOI: 10.1126/sciadv.aay6484

#### **This PDF file includes:**

Fig. S1. Crystallization and composition differences of bone apatite and HA-Tb nanocrystals.  
Fig. S2. Partial lattice models of HA, HA-Tb, and H<sub>2</sub>O-substituted HA.

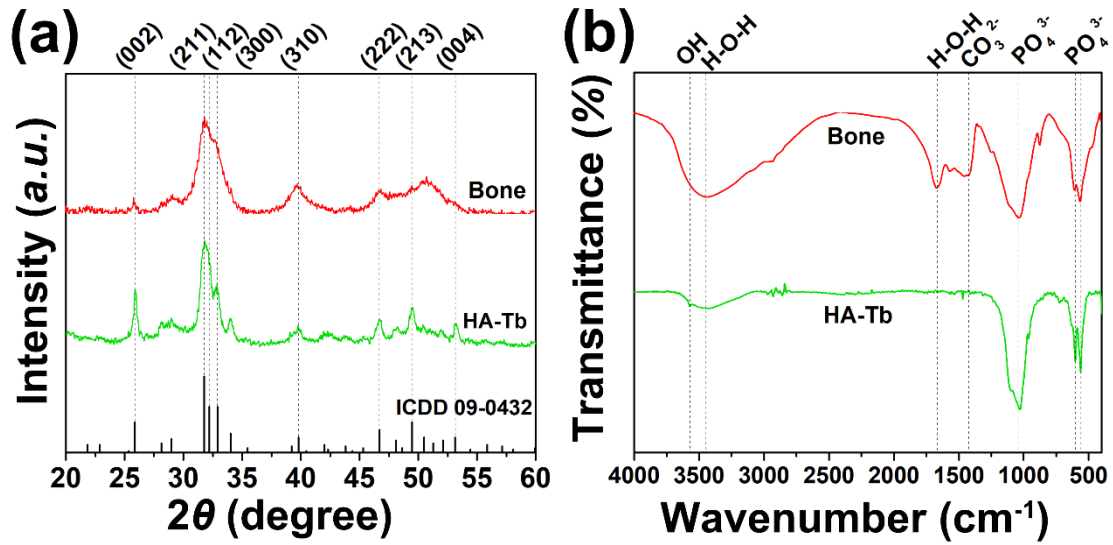

**Fig. S1. Crystallization and composition differences of bone apatite and HA-Tb nanocrystals.** XRD patterns (a) and IR spectra (b) of bone apatite and the synthetic HA-Tb nanocrystals showing their differences in crystallinity and in carbonate and hydroxyl peaks.

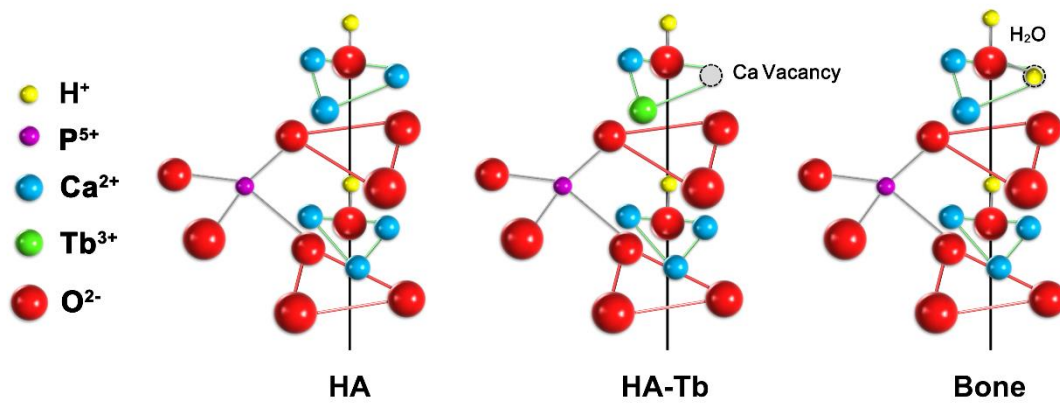

**Fig. S2. Partial lattice models of HA, HA-Tb, and H<sub>2</sub>O-substituted HA** with a water molecule replacing an OH position and a Ca position.
